# Supplementary material for: The Beneficial Effects of Triterpenic Acid and Acteoside in an In Vitro Model of Nonalcoholic Steatohepatitis (NASH)
Source: MDPI journal article supplement (doi:10.3390/ijms23073562), 2022-03-24
Supplement: s1 [file s1]

## The beneficial effects of Triterpenic acid and Acteoside in an *in vitro* model of Nonalcoholic steatohepatitis (NASH)

Noel Salvoza<sup>1,2</sup>, Chiara Bedin<sup>3</sup>, Andrea Saccani<sup>3</sup>, Claudio Tribelli<sup>1</sup>, and Natalia Rosso<sup>1\*</sup>

<sup>1</sup> Fondazione Italiana Fegato – ONLUS Area Science Park Basovizza SS14 km 163.5 34149 Trieste, Italy

<sup>2</sup> Philippine Council for Health Research and Development, DOST-Bicutan Taguig City 1631 Philippines

<sup>3</sup> ABRESEARCH SRL, via dell'Impresa, 1, 36040 Brendola (VI), Italy

\* Correspondence: natalia.rosso@fegato.it

Number of supplementary figures: 5

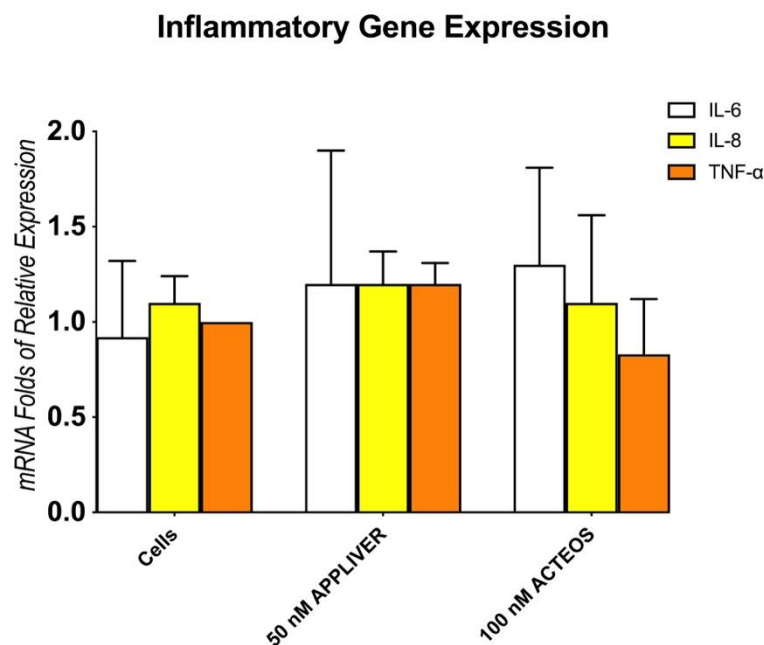

**Figure S1.** Assessment of anti-inflammatory properties of APPLIVER and ACTEOS without FFA on inflammatory cytokines mRNA expression. Gene expression analysis of pro-inflammatory cytokines (folds of mRNA expression *vs* cells without treatment). Values presented are the mean  $\pm$  SD of three independent experiments. No significant results *vs* cells. Abbreviations: FFA, free fatty acids; IL-6, interleukin-6; IL-8, interleukin-8; TNF- $\alpha$ , tumor necrosis – alpha.

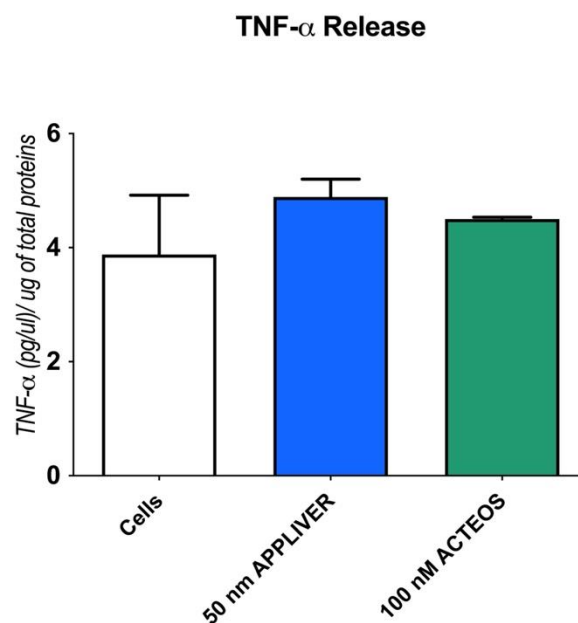

**Figure S2.** Quantification of TNF- $\alpha$  release in cell culture supernatant ((pg/ $\mu$ l)/  $\mu$ g of total proteins) upon treatment of either APPLIVER (A) or ACTEOS (B) without FFA after 1h. Values presented are the mean  $\pm$  SD of three independent experiments. No significant results *vs* cells. Abbreviations: FFA, free fatty acids; TNF- $\alpha$ , tumor necrosis – alpha.

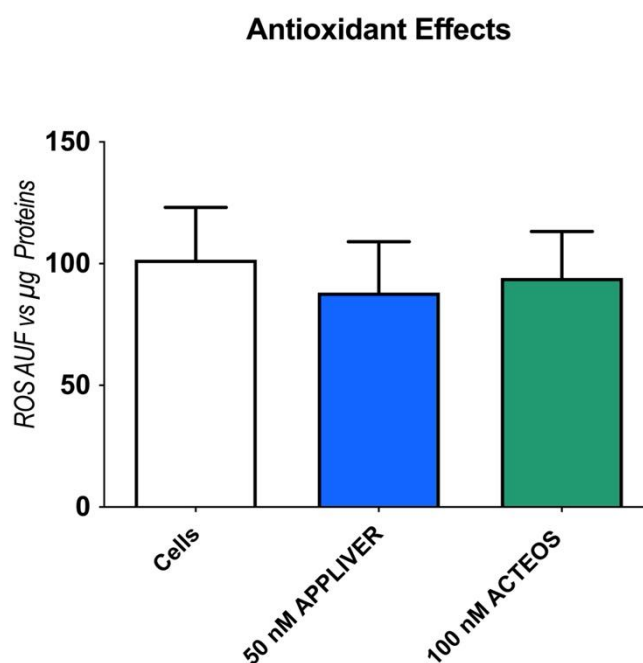

**Figure S3.** Assessment of antioxidant properties of APPLIVER and ACTEOS without FFA. Fluorescence was normalized by the total proteins present in the cell lysates ( $\mu$ g) assessed using fluorescamine assay. Values presented are the mean  $\pm$  SD of three independent experiments. No significant results *vs* cells. Abbreviations: AUF, arbitrary unit of fluorescence; FFA, free fatty acids; H<sub>2</sub>O<sub>2</sub>, hydrogen peroxide.

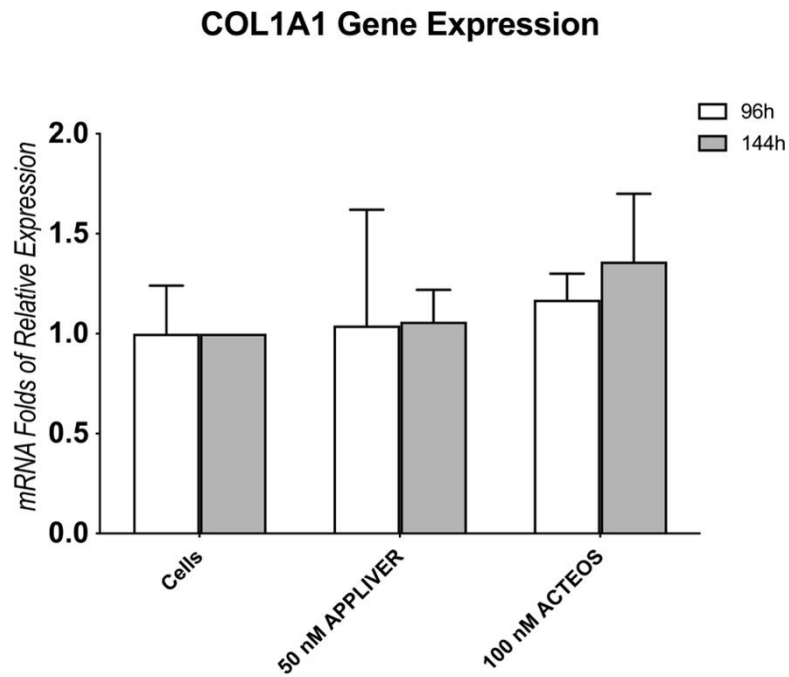

**Figure S4.** Gene expression of COL1A1 without exposure to FFA and APPLIVER and ACTEOS after 96h and 144h. Values presented are the mean  $\pm$  SD of three independent experiments. No significant results *vs* cells. Abbreviations: COL1A1, collagen type I alpha 1 chain; FFA, free fatty acids.

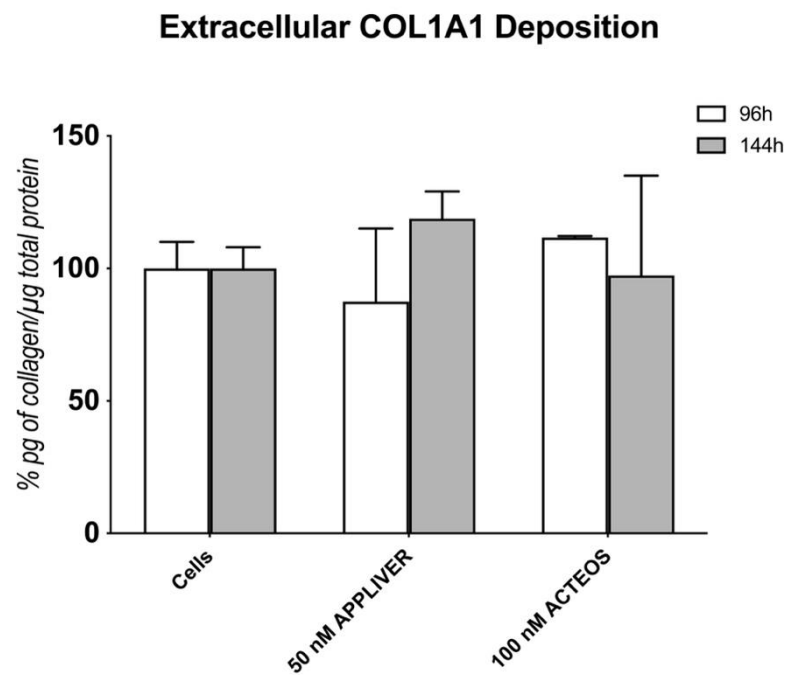

**Figure S5.** Quantification of extracellular COL1A1 deposition (% pg of collagen/μg total protein) using ELISA upon treatment of either APPLIVER or ACTEOS  $\pm$  FFA after 96h and 144h. COL1A1 deposition was normalized to the total proteins in the cell lysate and reported as percentage *vs* Vehicle. Values presented are the mean  $\pm$  SD of three independent experiments. No significant results *vs* cells. Abbreviations: COL1A1, collagen type I alpha 1 chain; FFA, free fatty acids.
